# Supplementary material
Source: PubMed Central journal article supplement (PMC4741342)
Supplement: supp_pp.15.00182_00182suppdata.pdf [file supp_pp.15.00182_00182suppdata.pdf]

Figure S1

A

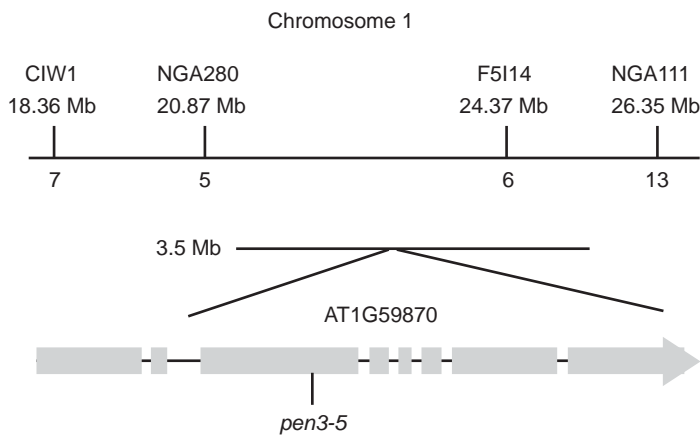

B

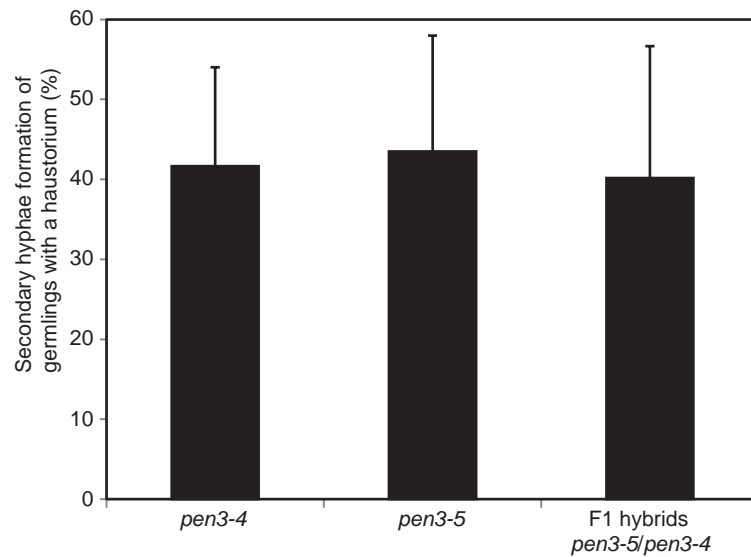

C

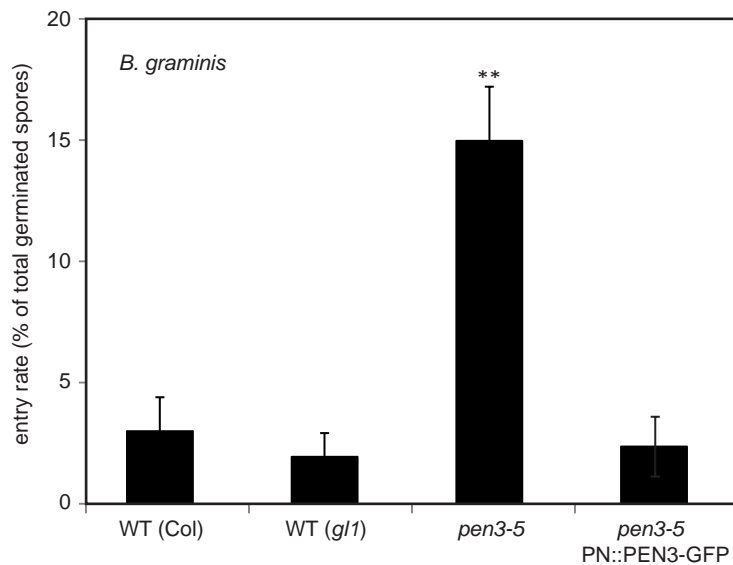

D

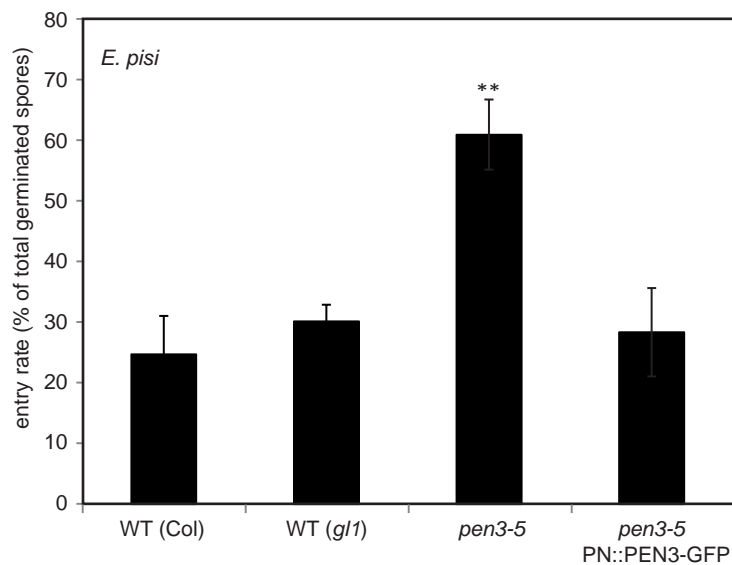

Figure S2

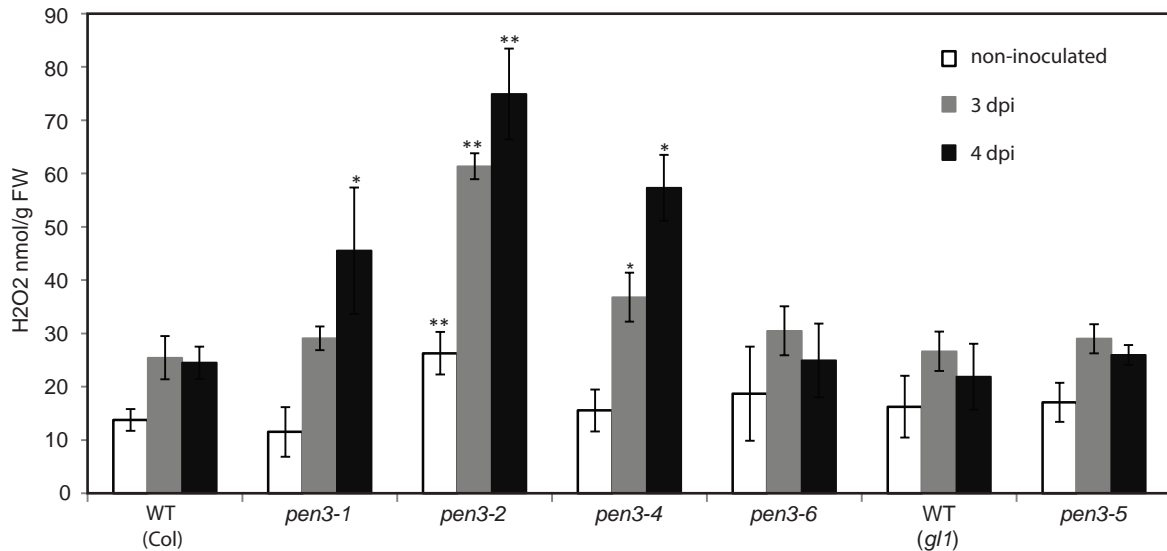

Figure S3

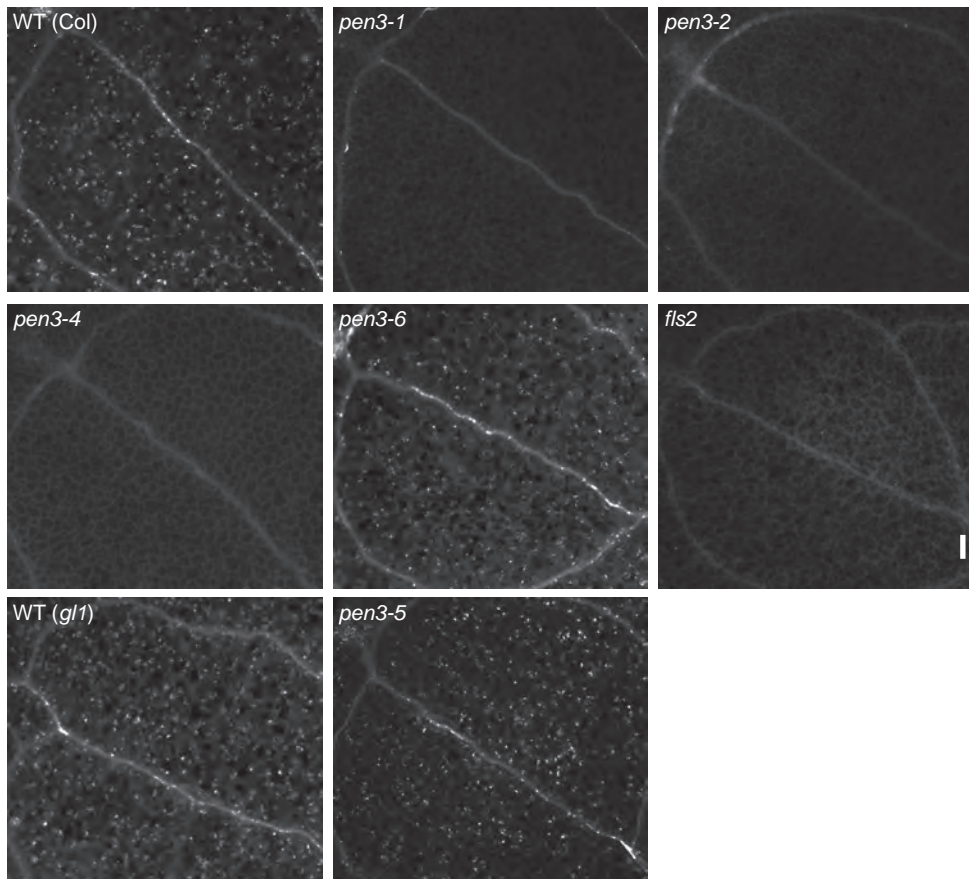

Figure S4

**A**

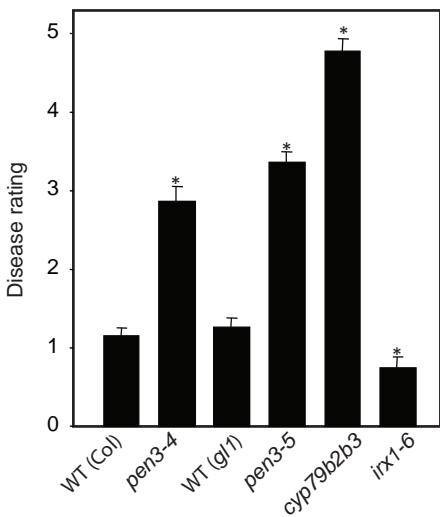

**B**

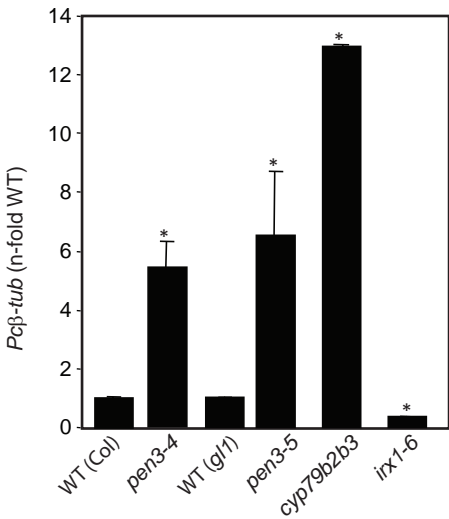

Figure S5

A

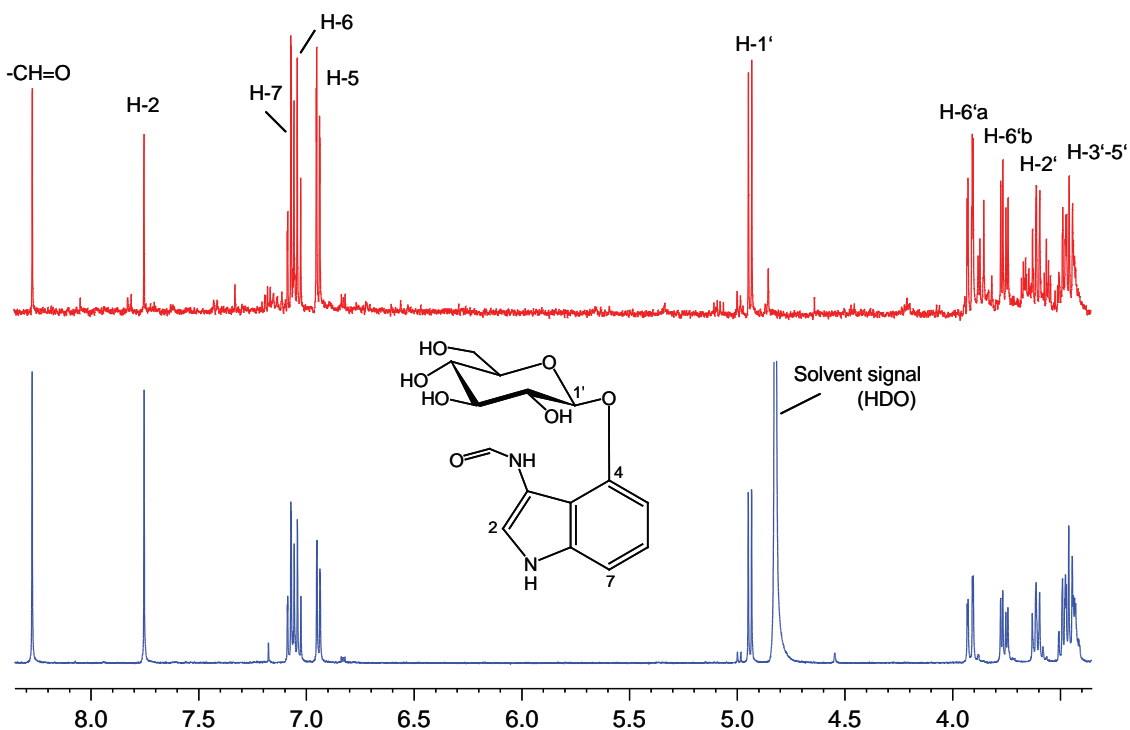

B

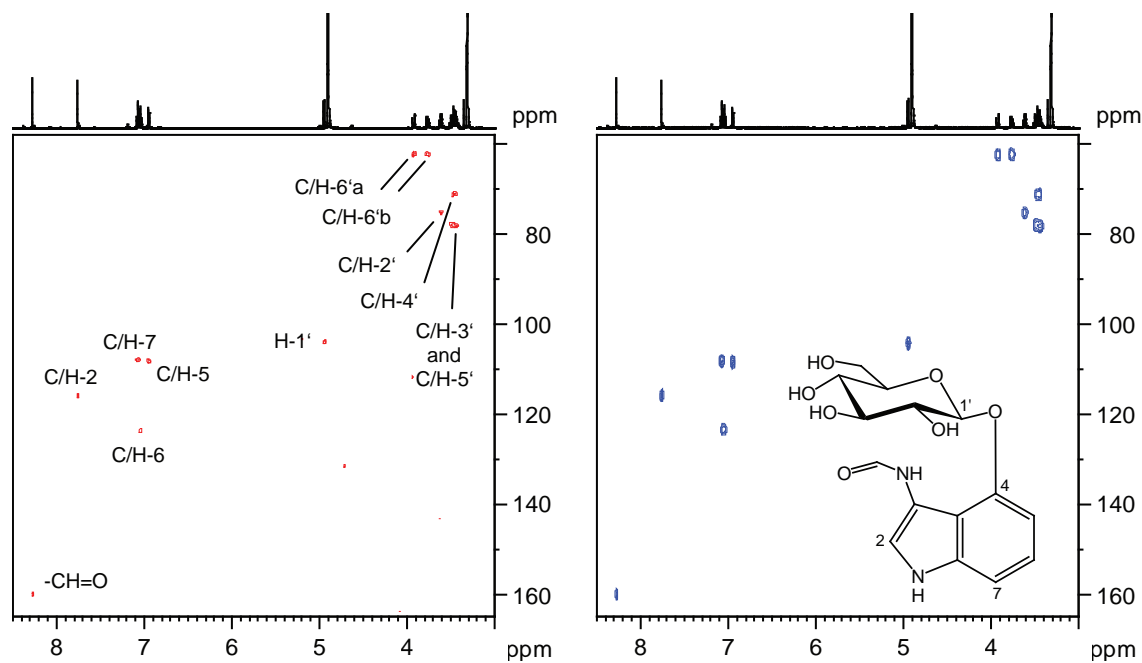

C

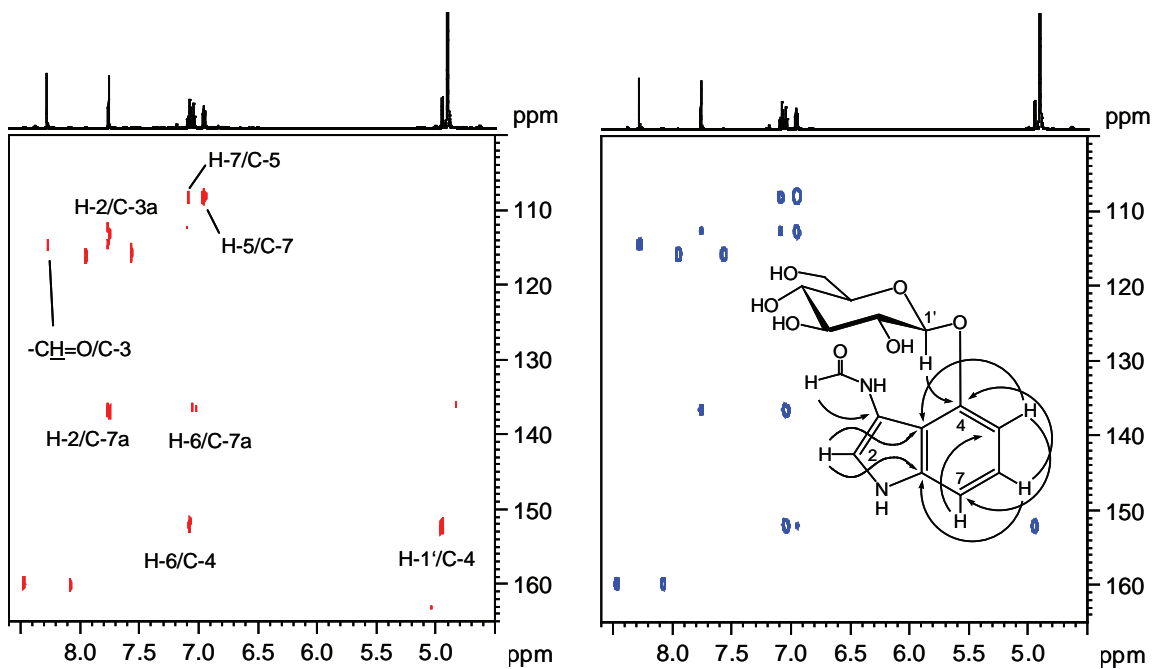

Figure S6

A

*G. orontii*

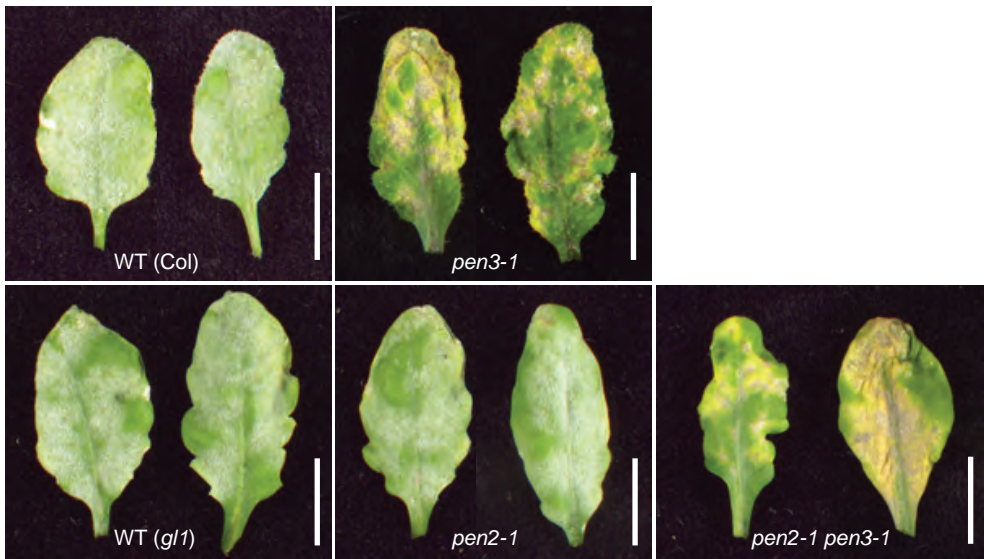

B

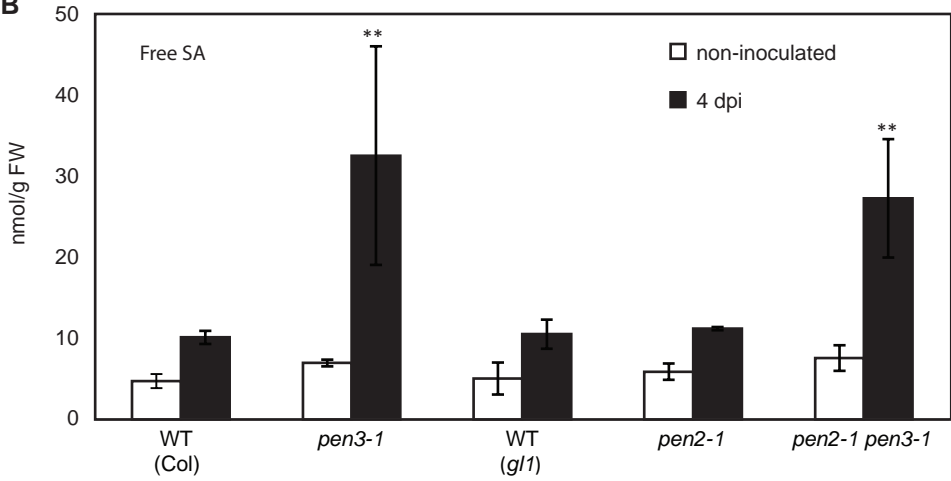

C

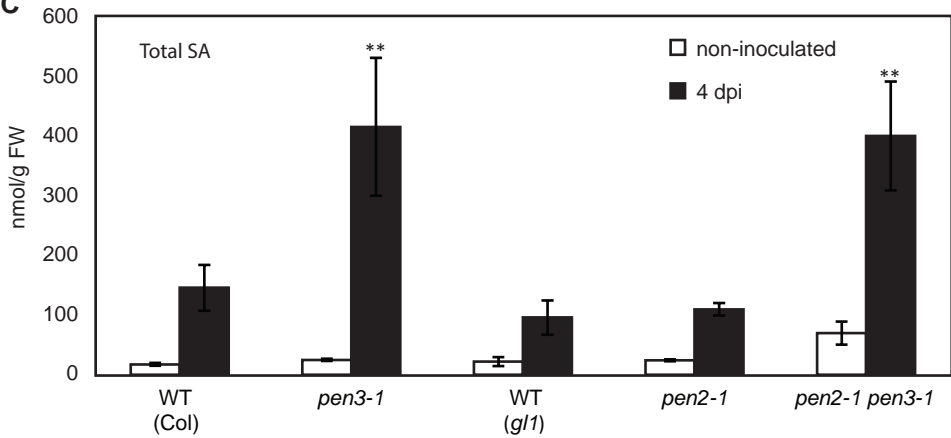

Figure S7

**A**

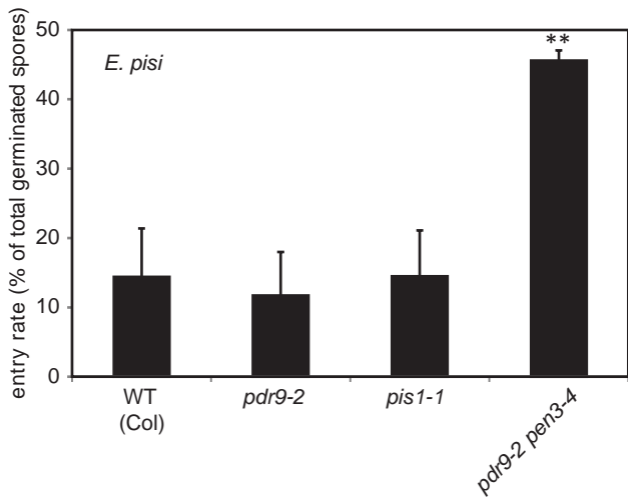

**B**

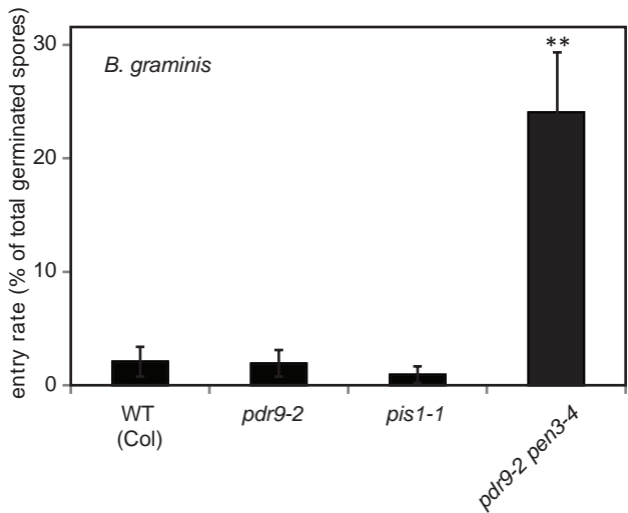

1 **Supplementary experimental procedures**

2

3 **Plant material and growth conditions**

4 We generated complementation lines by crossing *pen3-5* plants with a transgenic line  
5 expressing functional PEN3-GFP with native 5' regulatory PEN3 sequences in the *pen3-1*  
6 background (Stein et al., 2006). F<sub>1</sub> hybrids were validated for the presence of both *pen3-1* and  
7 *pen3-5* alleles using allele-specific PCR primers. Multiple F<sub>2</sub> plants were isolated after  
8 selection on kanamycin medium. The F<sub>2</sub> plants were subsequently genotyped for individuals  
9 lacking the *pen3-1* allele using allele-specific PCR primers. These plants were considered as  
10 *pen3-5* homozygotes carrying the PEN3-GFP transgene.

11

12 **MS and NMR analysis**

13 For LC-MS analysis the Ultimate 3000 series RSLC (Dionex, Sunnyvale, CA, USA) system  
14 and the Orbitrap XL mass spectrometer (Thermo Fisher Scientific, Bremen, Germany)  
15 operating at 35 000 and 7 500 HWPM resolution in MS and MS/MS mode, respectively, were  
16 used. Other conditions were similar as previously published (Bednarek et al., 2011).

17

18 <sup>1</sup>H nuclear magnetic resonance (<sup>1</sup>H NMR), <sup>1</sup>H-<sup>1</sup>H correlated spectroscopy (<sup>1</sup>H-<sup>1</sup>H COSY),  
19 heteronuclear single quantum coherence (HSQC) and heteronuclear multiple bond correlation  
20 (HMBC) spectra were recorded on an Avance 500 NMR spectrometer (Bruker, Karlsruhe,  
21 Germany) at 300 K using a 5 mm TCI CryoProbe<sup>TM</sup>. A double presaturation 1D NOESY  
22 pulse sequence (lc1pnf2; mixing time 100 ms) was used to suppress residual signals of water  
23 and methanol in the spectrum of the isolated sample. Chemical shift values (δ) are given  
24 relative to tetramethylsilane (TMS) as an internal standard, coupling constants in Hertz (Hz).

25

26 **NMR data**



27 <sup>1</sup>H NMR (500 MHz, MeOH-*d*<sub>4</sub>): δ 8.28 (1H, s, CHO), 7.76 (1H, s, H-2), 7.09 (1H, dd, *J* =  
28 8.1, 1.1 Hz, H-7), 7.05 (1H, dd, *J* = 8.1, 7.5 Hz, H-6), 6.94 (1H, dd, *J* = 7.5, 1.1 Hz, H-5),  
29 4.95 (1H, d, *J* = 7.9 Hz, H-1'), 3.92 (1H, dd, *J* = 12.0, 2.0 Hz, H-6'a), 3.76 (1H, dd, *J* = 12.0,  
30 5.0 Hz, H-6'b'), 3.62 (1H, dd, *J* = 9.2, 7.9 Hz, H-2'), 3.48 (1H, m, H-3'), 3.46 (1H, m, H-4'),  
31 3.44 (1H, m, H-5').

32 <sup>13</sup>C NMR (125 MHz, MeOH-*d*<sub>4</sub>): δ 160.0 (CHO), 152.2 (C-4), 136.5 (C-7a), 123.4 (C-6),  
33 115.8 (C-2), 114.6 (C-3), 112.4 (C-3a), 108.3 (C-5), 108.2 (C-7), 104.0 (C-1'), 78.2 (C-5'),  
34 78.0 (C-3'), 75.2 (C-2'), 71.1 (C-4'), 62.3 (C-6'). <sup>13</sup>C NMR data were obtained from HMBC  
35 and HSQC spectra.

36

### 37 **Structure elucidation**

38 Purified compound was investigated by LC/MS and LC/MS/MS using orbitrap analyzer.  
39 Molecular peak obtained in positive ion mode provided molecular mass *m/z* 339.11655 and  
40 molecular formula C<sub>15</sub>H<sub>19</sub>O<sub>7</sub>N<sub>2</sub> (mass error -2.7 ppm from theoretical mass). This [M+H]<sup>+</sup>  
41 was accompanied with *m/z* 177.06468 for which C<sub>9</sub>H<sub>9</sub>ON<sub>2</sub> was calculated. The mass and  
42 formula difference indicates that a hexose presence in the unknown compound. CID spectra  
43 on fixed *m/z* 177 precursor provide intense peak at *m/z* 149.07035 with calculated formula  
44 C<sub>8</sub>H<sub>9</sub>ON<sub>2</sub> indicating carbon monoxide loss presumably from a formyl group. Additional three  
45 less intense fragments at 159.05508, 132.04389 and 122.05972 indicates loss of water from  
46 *m/z* 177, ammonia and hydrogen cyanide from *m/z* 149. The proposed structure for unknown  
47 should contain hexose, formyl group and possess indol skeleton.

48

49 <sup>1</sup>H NMR, <sup>1</sup>H-<sup>1</sup>H COSY, HSQC and HMBC spectra were used for structure elucidation of  
50 4OGlcI3F. The <sup>1</sup>H NMR spectrum, measured in MeOH-*d*<sub>4</sub> showed signals of an ABX spin

51 system ( $\delta$  7.09, 7.05, 6.95) and a singlet at  $\delta$  7.76 assignable to H-2, which suggested a C-3-  
52 substituted indolic compound with an additional substitution in the six-membered ring.

53

54 HMBC correlations of H-2, H-5 ( $\delta$  6.95) and H-7 ( $\delta$  7.09) with the angular C-3a ( $\delta$  112.4), H-  
55 2 and H-5 with the low-field angular C-7a ( $\delta$  136.5), and mutual HMBC correlation between  
56 H-7/C-5 ( $\delta$  108.3) and H-5/C-7 ( $\delta$  108.2) confirmed the indolic structure of the aglycon. An  
57 HMBC correlation of H-6 ( $\delta$  7.05) with the carbon atom at  $\delta$  152.2 assigned this quaternary  
58 carbon atom to position 4 and the low-field chemical shift indicated substitution by an oxygen  
59 functionality. Signals of a hexose ( $\delta_{\text{H}}$  4.95, 3.92, 3.76, 3.62, 3.48, 3.46, 3.44;  $\delta_{\text{C}}$  104.0, 78.2,  
60 78.0, 75.2, 71.1, 62.3) which is  $\beta$ -configured at the anomeric centre ( $J = 7.9$  Hz of the doublet  
61 of H-1' at  $\delta$  4.95) were readily identified. An HMBC cross signal of H-1' with C-4 located the  
62 sugar unit at this particular carbon atom. Another singlet ( $\delta$  8.28), integrating for one proton,  
63 was attributed to a substituted methine group in an electronegative environment. According to  
64 a single HMBC correlation with a quaternary carbon atom assignable to C-3 ( $\delta$  114.6), the  
65 proton at  $\delta$  8.28 must be located in the side chain in a three bond-distance to C-3.

66

67 Based on these data, the structure of isolated compound was preliminary assigned as a 4-*O*- $\beta$ -  
68 hexosyl-indole with a N,C,O-containing side chain at C-3. The exact match of the NMR and  
69 MS data of the isolated and synthetic samples finally established the structure as 4-*O*- $\beta$ -D-  
70 glucosyl-1*H*-indol-3-yl formamide (4OGlcI3F).

71

## 72 **Synthesis of 4-*O*- $\beta$ -D-glucosyl-1*H*-indol-3-yl formamide**

73 The compound was prepared using standard synthetic procedures of a wet chemistry and  
74 details will be published elsewhere. Analytical data of prepared compound was:  $^1\text{H}$  NMR  
75 (500 MHz, *d*<sub>4</sub>-MeOH):  $\delta$  = 3.46 (m, 3H), 3.61 (m, 1H), 3.76 (dd, 1H,  $J = 12.0$  and 4.9 Hz),

76 3.92 (dd, 1H,  $J = 12.0$  and  $2.1$  Hz), 4.94 (d, 1H,  $J = 7.9$  Hz), 6.94 (dd, 1H,  $J = 7.4$  and  $1.0$   
77 Hz), 7.04 (dd, 1H,  $J = 8.2$  and  $7.4$  Hz), 7.08 (dd, 1H,  $J = 8.2$  and  $1.0$  Hz), 7.75 (s, 1H), 8.27 (s,  
78 1H). MS (ESI)  $m/z$  (%):  $[M+Na]^+$  361.10 (51),  $[M+H]^+$  339.12 (23),  $[M+H-Glc]^+$  177.07  
79 (100).

80

81 **Bednarek P, Pislewska-Bednarek M, Ver Loren van Themaat E, Maddula RK, Svatos A,**  
82 **Schulze-Lefert P** (2011) Conservation and clade-specific diversification of pathogen-  
83 inducible tryptophan and indole glucosinolate metabolism in *Arabidopsis thaliana*  
84 relatives. *New Phytol* **192**: 713-726  
85 **Stein M, Dittgen J, Sanchez-Rodriguez C, Hou BH, Molina A, Schulze-Lefert P, Lipka V,**  
86 **Somerville S** (2006) *Arabidopsis* PEN3/PDR8, an ATP binding cassette transporter,  
87 contributes to nonhost resistance to inappropriate pathogens that enter by direct  
88 penetration. *Plant Cell* **18**: 731-746

89

- 1 **Supplemental Table S1.** Segregation of the *eds* phenotype in F<sub>2</sub> progeny of the enhancer line  
 2 157 crossed with *pen2-1* in Ler background.

| Cross                        | No. of <i>eds</i> plants | No. of WT plants | $\chi^2$ (1:3) | P value |
|------------------------------|--------------------------|------------------|----------------|---------|
| line 157 × Ler <i>pen2-1</i> | 26                       | 88               | 0.2924         | 0.5887  |

- 3  
 4 F<sub>2</sub> plants were tested for the *eds* phenotype as described in Figure 1a.  
 5 Segregation data were evaluated with the  $\chi^2$  test by using a 1:3 segregation of the *eds* phenotype  
 6 as null hypothesis.  
 7

1 **Supplemental Figure legends**

2

3 **Supplemental Figure S1.** *pen3-5* and *pen3-4* plants support a similar level of *B.*  
4 *graminis* secondary hypha formation.

5 A, The genomic region around the *PEN3* locus (AT1G59870). The positions of DNA  
6 markers for the low-resolution mapping and the numbers of recombination for plants  
7 showing the mutant phenotype are shown (upper part). The exon-intron structure (gray  
8 boxes and black lines represent protein-coding and non-coding regions, respectively) of  
9 *PEN3* and the position of the mutation site are shown (lower part).

10 B, Incidence of *B. graminis* microcolonies ( $\geq 2$  branched hyphae) of fungal germlings  
11 with a haustorium on *pen3-4*, *pen3-5* leaves, and F<sub>1</sub> hybrids at 2 dpi. Error bars denote  
12 standard deviations based on microscopic evaluation of at least 600 single plant-fungus  
13 interaction sites collected from four *pen3-4* and *pen3-5* plants and 20 F<sub>1</sub> hybrid plants.

14 C, *B. graminis* entry rates of germinated conidiospores on leaves of wild type, *pen3-5*  
15 and the transgenic PN:PEN3-GFP complementation lines at 2 dpi. Error bars denote  
16 standard deviations based on at least 600 fungus-plant interaction sites microscopically  
17 inspected on leaves collected from four plants. Asterisks indicate statistically significant  
18 differences between WT and mutants (\*\*P<0.01, Student's *t* test).

19 D, *E. pisi* entry rates of germinated conidiospores on leaves of wild type, *pen3-5* and the  
20 transgenic PN:PEN3-GFP complementation lines at 7 dpi. Error bars denote standard  
21 deviations based on at least 600 fungus-plant interaction sites microscopically inspected  
22 on leaves collected from four plants. Asterisks indicate statistically significant  
23 differences between WT and mutants (\*\*P<0.01, Student's *t* test).

24

25 **Supplemental Figure S2.** Hydrogen peroxide levels in *pen3* plants upon *G. orontii*  
26 inoculation.

27 Hydrogen peroxide levels in leaves of non-inoculated (white bars) and *G. orontii*  
28 inoculated plants at 3 dpi (grey bars) and 4 dpi (black bars) are indicated for each plant  
29 genotype. Error bars denote standard deviations from six plants. Asterisks indicate  
30 statistically significant differences between WT and mutants (\* $p < 0.05$  and \*\*  $p < 0.01$ ,  
31 Student's *t* test).

32

33 **Supplemental Figure S3.** Flg22-induced callose deposition in *pen3* mutants.

34 The micrographs show extracellular callose deposition in cotyledons of each indicated  
35 genotype at 24 h after flg22 treatment. Representative examples of 40 to 60 cotyledons  
36 from three independent experiments per genotype are presented. Bar = 100  $\mu\text{m}$ .

37

38 **Supplemental Figure S4.** *pen3-5* plants are super-susceptible to the necrotrophic  
39 pathogen *Plectosphaerella cucumerina*.

40 A, Disease rating (DR) of the indicated genotypes inoculated with the necrotrophic  
41 fungus *P. cucumerina* strain BMM at 8 dpi. DR varies between 0 (no symptoms) and 5  
42 (dead plant). The *cyp79b279b3* and *irx1-6* mutants (in Col-0 background), that are  
43 hypersusceptible and resistant to *P. cucumerina*, respectively, were included for  
44 comparison. Error bars denote standard deviations from three technical replicates.  
45 Asterisks indicate statistically significant differences between WT and mutants  
46 (\* $p < 0.05$ , One-way ANOVA and Bonferroni's test).

47 B, qRT-PCR quantification of fungal DNA (*Pc $\beta$ -tubulin*) at 5 dpi on leaves of the  
48 indicated genotypes. Values are represented as the average of the n-fold fungal DNA

49 levels, relative to that on wild-type plants. Asterisks indicate statistically significant  
50 differences between WT and mutants (\* $P < 0.05$ , One-way ANOVA and Bonferroni's  
51 test).

52

53 **Supplemental Figure S5.** NMR spectra of 4-*O*- $\beta$ -D-glucosyl-1*H*-indol-3-yl formamide.

54 A,  $^1\text{H}$  NMR spectra (500 MHz,  $\text{MeOH-}d_4$ ). Isolated sample (red); synthetic sample  
55 (blue).

56 B, HSQC spectra ( $^1\text{H}$ : 500 MHz,  $^{13}\text{C}$ : 125 MHz,  $\text{MeOH-}d_4$ ). Isolated sample (left panel);  
57 synthetic sample (right panel).

58 C, HMBC partial spectra ( $^1\text{H}$ : 500 MHz,  $^{13}\text{C}$ : 125 MHz,  $\text{MeOH-}d_4$ ). Isolated sample  
59 (left panel); synthetic sample (right panel).

60

61 **Supplemental Figure S6.** SA hyperaccumulation in *pen3* plants is independent of  
62 PEN2 function.

63 A, Sporulating *G. orontii* mycelium (8 dpi) is macroscopically visible on leaves of WT  
64 and *pen2-1*, but not on *pen3-1* and *pen2-1 pen3-1* leaves. Note pathogen-inducible leaf  
65 chlorosis in *pen3-1* and *pen2-1 pen3-1* leaves. Bar = 1 cm.

66 B, Free SA levels in leaves of non-inoculated (white bars) and *G. orontii* inoculated  
67 plants (4 dpi, black bars) of the indicated genotypes. Error bars denote standard  
68 deviations from at least 8 plants. Asterisks indicate statistically significant differences  
69 between WT and mutants (\*\*  $p < 0.01$ , Student's *t* test).

70 C, Total SA levels in leaves of non-inoculated (white bars) and *G. orontii* inoculated  
71 plants (4 dpi, black bars) of the indicated genotypes. Error bars denote standard

72 deviations from at least 8 plants. Asterisks indicate statistically significant differences  
73 between WT and mutants (\*\*  $p < 0.01$ , Student's  $t$  test).

74

75 **Supplemental Figure S7.** PDR9 transporter is dispensable for pre-invasive defense to  
76 non-adapted powdery mildews.

77 A, *E. pisi* entry rates of germinated conidiospores on WT, *pdr9-2*, *pis1-1* and *pdr9-2*  
78 *pen3-4* leaves at 7 dpi. Error bars denote standard deviations based on at least 600  
79 fungus-plant interaction sites from four plants. Asterisks indicate statistically significant  
80 differences between WT and mutants (\*\* $P < 0.01$ , Student's  $t$  test).

81 B, *B. graminis* entry rates of germinated conidiospores on WT, *pdr9-2*, *pis1-1* and *pdr9-2*  
82 *pen3-4* leaves at 2 dpi. Error bars denote standard deviations based on at least 600  
83 fungus-plant interaction sites from four plants. Asterisks indicate statistically significant  
84 differences between WT and mutants (\*\* $P < 0.01$ , Student's  $t$  test).

85
